# Supplementary material for: A pharmacogenetics study of platinum-based chemotherapy in lung cancer: ABCG2 polymorphism and its genetic interaction with SLC31A1 are associated with response and survival
Source: PubMed Central journal article supplement (PMC7847637; doi:10.7150/jca.51621), 2021-01-01
Supplement: jcav12p1270s1.pdf [file jcav12p1270s1.pdf]

**A pharmacogenetics study of platinum-based chemotherapy in lung cancer: *ABCG2* polymorphism and its genetic interaction with *SLC31A1* are associated with response and survival**

Liyan Wang, Chang Sun, Xiangnan Li, Chenxue Mao, Ji Qian, Jiucun Wang, Junjie Wu, Qiang Li, Chunxue Bai, Baohui Han, Zhiqiang Gao, Jibin Xu, Jiye Yin, Zhaoqian Liu, Daru Lu, Li Jin and Haijian Wang

Supplemental Materials

Supplemental Table 1. *ABCG2* tag and potentially functional SNPs genotyped in the cohort of NSCLC patients

Supplemental Table 2. Association between *ABCG2* SNPs and response

Supplemental Table 3. Stratification analysis of association between *ABCG2* SNPs and response

Supplemental Table 4. Association between *SLC31A1* rs2233914 (G/A) and response

Supplemental Table 5. The ORR related to the joint effects of *SLC31A1* rs2233914 (G/A) and *ABCG2* rs2231142 (A/C) polymorphisms

Supplemental Table 6. Association between *ABCG2* SNPs and survival

Supplemental Table 7. Stratification analysis of association between *ABCG2* polymorphisms and overall survival

Supplemental Table 8. Joint association of *SLC31A1* rs10759637 (A/C) and *ABCG2* rs2231142 (C/A) with overall survival

Supplemental Table 9. Genotypic distribution of *ABCG2* SNPs between NSCLC patients with mild or severe toxicological outcomes

Supplemental Table 10. Association between *ABCG2* SNPs and toxicity outcomes

Supplemental Table 11. Association between objective response rate and overall survival

Supplemental Table 12. Association between objective response rate and progression free survival

Supplemental Figure 1. Schematic structure of *ABCG2* gene and linkage disequilibrium of its candidate SNPs in the NSCLC cohort

Supplemental Figure 2. Kaplan-Meier curve of estimated overall survival for the NSCLC cohort according to *ABCG2* rs2231142 and *SLC31A1* rs10759637 polymorphisms

**Supplemental Table 1. *ABCG2* tag and potentially functional SNPs genotyped in the cohort of NSCLC patients**

| SNP        | Chr4 position | Genic location | Allele (Wild/Variant) | Genotyping rate (%) | Minor allele frequency |         |       |                          | <i>P</i> value for HWE |         |       | <i>P</i> value <sup>b</sup> | Effect    |
|------------|---------------|----------------|-----------------------|---------------------|------------------------|---------|-------|--------------------------|------------------------|---------|-------|-----------------------------|-----------|
|            |               |                |                       |                     | Panel A                | Panel B | All   | Chinese Han <sup>a</sup> | Panel A                | Panel B | All   |                             |           |
| rs2231164  | 88094705      | intron         | A/G                   | 100.0               | 0.483                  | 0.468   | 0.472 | 0.476                    | 0.683                  | 0.877   | 1.000 | 0.599                       |           |
| rs4148157  | 88099782      | intron         | G/A                   | 100.0               | 0.283                  | 0.258   | 0.264 | 0.231                    | 0.904                  | 0.472   | 0.724 | 0.017                       |           |
| rs12505410 | 88109689      | intron         | A/C                   | 100.0               | 0.314                  | 0.342   | 0.335 | 0.322                    | 0.266                  | 0.913   | 0.537 | 0.493                       |           |
| rs2231146  | 88118348      | intron         | A/G                   | 100.0               | 0.230                  | 0.242   | 0.239 | 0.219                    | 0.210                  | 0.632   | 0.217 | 0.322                       |           |
| rs1871744  | 88118477      | intron         | A/G                   | 100.0               | 0.300                  | 0.317   | 0.313 | 0.298                    | 0.172                  | 0.389   | 0.110 | 0.503                       |           |
| rs11931123 | 88128956      | intron         | A/C                   | 97.9                | 0.078                  | 0.092   | 0.089 | 0.084                    | 0.564                  | 0.850   | 0.695 | 0.959                       |           |
| rs2231142  | 88131171      | exon           | C/A                   | 100.0               | 0.325                  | 0.315   | 0.317 | 0.284                    | 0.823                  | 0.893   | 0.995 | 0.299                       | Gln141Lys |
| rs2231138  | 88132566      | intron         | A/G                   | 100.0               | 0.076                  | 0.100   | 0.095 | 0.103                    | 0.994                  | 0.999   | 1.000 | 0.573                       |           |
| rs17731538 | 88134227      | intron         | G/A                   | 100.0               | 0.051                  | 0.057   | 0.055 | 0.065                    | 0.762                  | 0.902   | 0.771 | 0.654                       |           |
| rs2231137  | 88139962      | exon           | G/A                   | 72.6                | 0.340                  | 0.395   | 0.381 | 0.322                    | 0.973                  | 0.519   | 0.672 | 0.077                       | Val12Met  |
| rs2725252  | 88140758      | intron         | C/A                   | 100.0               | 0.407                  | 0.364   | 0.374 | 0.413                    | 0.913                  | 0.818   | 0.944 | 0.319                       |           |
| rs3109823  | 88143450      | intron         | A/G                   | 100.0               | 0.207                  | 0.226   | 0.222 | 0.202                    | 0.286                  | 0.990   | 0.695 | 0.666                       |           |
| rs6857600  | 88144923      | intron         | G/A                   | 100.0               | 0.120                  | 0.134   | 0.130 | 0.142                    | 0.996                  | 0.350   | 0.445 | 0.830                       |           |

<sup>a</sup> Minor allele frequency for the Chinese Han population ( $n = 208$ ) in the 1000genome database.

<sup>b</sup> Pearson  $\chi^2$  tests for overall distributions for SNPs genotypes between the cohort of NSCLC patients in this study and Chinese Han population ( $n = 208$ ) in the 1000genome database.

**Supplemental Table 2. Association between *ABCG2* SNPs and response**

| SNP        | Genotype | Panel A                   |                             | Panel B                   |                             | All                       |                             |
|------------|----------|---------------------------|-----------------------------|---------------------------|-----------------------------|---------------------------|-----------------------------|
|            |          | Response<br>(CR+PR/SD+PD) | <i>P</i> value <sup>a</sup> | Response<br>(CR+PR/SD+PD) | <i>P</i> value <sup>a</sup> | Response<br>(CR+PR/SD+PD) | <i>P</i> value <sup>a</sup> |
| rs2231164  | A/A      | 16/51                     | 0.274                       | 33/173                    | <b>0.028</b>                | 49/224                    | <b>0.035</b>                |
|            | A/G      | 16/92                     |                             | 60/316                    |                             | 76/408                    |                             |
|            | G/G      | 12/47                     |                             | 40/119                    |                             | 52/166                    |                             |
| rs4148157  | G/G      | 23/100                    | 0.433                       | 63/335                    | <b>0.036</b>                | 86/435                    | <b>0.043</b>                |
|            | G/A      | 16/75                     |                             | 57/245                    |                             | 73/320                    |                             |
|            | A/A      | 5/15                      |                             | 13/28                     |                             | 18/43                     |                             |
| rs12505410 | A/A      | 21/96                     | 0.561                       | 69/258                    | 0.131                       | 90/354                    | 0.282                       |
|            | A/C      | 15/71                     |                             | 51/272                    |                             | 66/343                    |                             |
|            | C/C      | 8/23                      |                             | 13/78                     |                             | 21/101                    |                             |
| rs2231146  | A/A      | 25/121                    | 0.384                       | 87/348                    | 0.178                       | 112/469                   | 0.541                       |
|            | A/G      | 13/55                     |                             | 40/215                    |                             | 53/270                    |                             |
|            | G/G      | 6/14                      |                             | 6/45                      |                             | 12/59                     |                             |
| rs1871744  | A/A      | 25/98                     | <b>0.023</b>                | 77/279                    | <b>0.042</b>                | 102/377                   | <b>0.022</b>                |
|            | A/G      | 9/72                      |                             | 44/254                    |                             | 53/326                    |                             |
|            | G/G      | 10/20                     |                             | 12/75                     |                             | 22/95                     |                             |
| rs11931123 | A/A      | 40/159                    | 0.446                       | 111/484                   | 0.485                       | 151/643                   | 0.253                       |
|            | A/C      | 4/27                      |                             | 17/102                    |                             | 21/129                    |                             |
|            | C/C      | 0/3                       |                             | 1/7                       |                             | 1/10                      |                             |
| rs2231142  | C/C      | 21/89                     | 0.618                       | 55/292                    | <b>0.002<sup>b</sup></b>    | 76/381                    | <b>0.005<sup>b</sup></b>    |
|            | C/A      | 17/80                     |                             | 55/270                    |                             | 72/350                    |                             |
|            | A/A      | 6/21                      |                             | 23/46                     |                             | 29/67                     |                             |
| rs2231138  | A/A      | 37/162                    | 0.844                       | 106/495                   | 0.846                       | 143/657                   | 0.777                       |
|            | A/G      | 7/27                      |                             | 26/107                    |                             | 33/134                    |                             |
|            | G/G      | 0/1                       |                             | 1/6                       |                             | 1/7                       |                             |
| rs17731538 | G/G      | 42/170                    | 0.463                       | 119/538                   | 0.851                       | 161/708                   | 0.535                       |

|           |     |        |       |         |       |         |       |
|-----------|-----|--------|-------|---------|-------|---------|-------|
| rs2231137 | G/A | 2/18   | 0.385 | 14/67   | 0.250 | 16/85   | 0.718 |
|           | A/A | 0/2    |       | 0/3     |       | 0/5     |       |
|           | G/G | 15/66  |       | 39/147  |       | 54/213  |       |
| rs2725252 | G/A | 16/64  | 0.609 | 49/223  | 0.191 | 65/287  | 0.191 |
|           | A/A | 7/15   |       | 9/65    |       | 16/80   |       |
|           | C/C | 17/63  |       | 63/239  |       | 80/302  |       |
| rs3109823 | C/A | 22/95  | 0.958 | 51/282  | 0.810 | 73/377  | 0.892 |
|           | A/A | 5/32   |       | 19/87   |       | 24/119  |       |
|           | A/A | 28/125 |       | 83/364  |       | 111/489 |       |
| rs6857600 | A/G | 13/52  | 0.542 | 44/210  | 0.474 | 57/262  | 0.382 |
|           | G/G | 3/13   |       | 6/34    |       | 9/47    |       |
|           | G/G | 36/144 |       | 106/458 |       | 142/602 |       |
|           | G/A | 8/43   |       | 23/134  |       | 31/177  |       |
|           | A/A | 0/3    |       | 4/16    |       | 4/19    |       |

<sup>a</sup> *P* values of Pearson  $\chi^2$  tests.

<sup>b</sup> Statistical significance remained after multiple tests adjustment taking into account linkage disequilibrium between polymorphisms.

**Supplemental Table 3. Stratification analysis of association between *ABCG2* SNPs and response**

| SNP<br>(Wild/Variant, W/V) | Stratification subgroup |                | Genotype (WW–WV–VV) |            | Genetic model <sup>a</sup> | OR (95% CI) <sup>b</sup> | P value <sup>b</sup>        |
|----------------------------|-------------------------|----------------|---------------------|------------|----------------------------|--------------------------|-----------------------------|
|                            |                         |                | CR+PR               | SD+PD      |                            |                          |                             |
| rs1871744<br>(A/G)         | Gender                  | Male           | 79–32–20            | 262–228–68 | Under-DOM                  | <b>0.42 (0.27–0.67)</b>  | <b>2.37×10<sup>-4</sup></b> |
|                            |                         | Female         | 23–21–2             | 115–98–27  | REC                        | 0.48 (0.11–2.16)         | 0.338                       |
|                            | Age                     | ≤58            | 41–32–10            | 195–166–58 | DOM                        | 0.86 (0.53–1.42)         | 0.557                       |
|                            |                         | >58            | 61–21–12            | 182–160–37 | Under-DOM                  | <b>0.39 (0.23–0.68)</b>  | <b>0.001</b>                |
|                            | ECOG PS                 | 0-1            | 96–45–21            | 339–294–83 | Under-DOM                  | <b>0.56 (0.38–0.83)</b>  | <b>0.003</b>                |
|                            |                         | 2              | 6–7–1               | 32–29–9    | REC                        | 0.13 (0.01–3.21)         | 0.210                       |
|                            | Smoking status          | Nonsmoker      | 36–27–6             | 165–139–38 | REC                        | 0.88 (0.35–2.22)         | 0.782                       |
|                            |                         | Smoker         | 66–26–16            | 211–187–57 | DOM                        | <b>0.41 (0.25–0.68)</b>  | <b>0.001</b>                |
|                            | TNM stage               | IIIA           | 17–9–1              | 26–23–3    | DOM                        | 0.48 (0.16–1.40)         | 0.179                       |
|                            |                         | IIIB           | 31–18–7             | 114–93–21  | Under-DOM                  | 0.63 (0.32–1.22)         | 0.172                       |
|                            |                         | IV             | 54–26–14            | 234–208–71 | Under-DOM                  | <b>0.59 (0.36–0.97)</b>  | <b>0.038</b>                |
|                            | Histological type       | AC             | 39–30–9             | 257–215–62 | REC                        | 1.21 (0.56–2.60)         | 0.628                       |
|                            |                         | SCC            | 38–18–6             | 62–72–21   | DOM                        | <b>0.40 (0.21–0.75)</b>  | <b>0.005</b>                |
|                            | Therapy regimens        | Pt-navelbine   | 40–24–9             | 117–89–23  | Under-DOM                  | 0.73 (0.41–1.31)         | 0.292                       |
|                            |                         | Pt-gemcitabine | 22–9–6              | 83–79–32   | DOM                        | 0.54 (0.25–1.16)         | 0.114                       |
|                            |                         | Pt-paclitaxe   | 27–16–6             | 125–112–24 | Under-DOM                  | 0.66 (0.34–1.31)         | 0.237                       |
| Pt-docetaxel               |                         | 6–4–1          | 35–30–9             | Under-DOM  | 0.35 (0.06–1.94)           | 0.227                    |                             |
| rs2231142<br>(C/A)         | Gender                  | Male           | 59–49–23            | 265–245–48 | REC                        | <b>2.19 (1.23–3.92)</b>  | <b>0.008</b>                |
|                            |                         | Female         | 17–23–6             | 116–105–19 | DOM                        | 1.63 (0.82–3.22)         | 0.164                       |
|                            | Age                     | ≤58            | 35–38–10            | 210–181–28 | REC                        | 1.95 (0.87–4.37)         | 0.106                       |
|                            |                         | >58            | 41–34–19            | 171–169–39 | REC                        | <b>2.49 (1.30–4.78)</b>  | <b>0.006</b>                |
|                            | ECOG PS                 | 0-1            | 70–65–27            | 340–317–59 | REC                        | <b>2.05 (1.28–3.60)</b>  | <b>0.004</b>                |
|                            |                         | 2              | 5–7–2               | 34–30–6    | DOM                        | 2.20 (0.46–10.45)        | 0.321                       |
|                            | Smoking status          | Nonsmoker      | 26–31–12            | 163–154–25 | REC                        | <b>2.35 (1.05–5.23)</b>  | <b>0.037</b>                |
|                            |                         | Smoker         | 50–41–17            | 218–196–41 | REC                        | 1.84 (0.96–3.53)         | 0.065                       |

|                   |                |          |            |           |                          |              |
|-------------------|----------------|----------|------------|-----------|--------------------------|--------------|
| TNM stage         | IIIA           | 14–9–4   | 22–24–6    | Under-DOM | <b>0.54 (0.18–1.60)</b>  | <b>0.267</b> |
|                   | IIIB           | 22–25–9  | 110–91–27  | REC       | <b>2.96 (1.51–5.82)</b>  | <b>0.002</b> |
|                   | IV             | 40–38–16 | 248–231–34 | DOM       | 1.48 (0.79–2.76)         | 0.220        |
| Histological type | AC             | 34–35–9  | 251–237–46 | REC       | 1.35 (0.62–2.94)         | 0.449        |
|                   | SCC            | 27–21–14 | 81–63–11   | REC       | <b>3.56 (1.46–8.66)</b>  | <b>0.005</b> |
| Therapy regimens  | Pt-navelbine   | 31–34–8  | 108–96–25  | DOM       | 1.39 (0.79–2.43)         | 0.251        |
|                   | Pt-gemcitabine | 16–15–6  | 98–87–9    | REC       | <b>3.65 (1.12–11.83)</b> | <b>0.031</b> |
|                   | Pt-paclitaxe   | 20–16–13 | 120–117–24 | REC       | <b>3.47 (1.50–8.02)</b>  | <b>0.004</b> |
|                   | Pt-docetaxel   | 8–3–0    | 36–33–5    | DOM       | <b>0.12 (0.02–0.93)</b>  | <b>0.043</b> |

<sup>a</sup> For each SNP, three different genetic models (dominant, recessive and under-dominant) were analyzed, and the model with lowest *P* values was considered the best-fitting model.

<sup>b</sup> Odds ratios (OR) and their 95% confidence intervals (CIs) and *P* values were calculated with unconditional logistic regression analysis, with adjustment of gender, age, smoking status, ECOG performance status, TNM status, histological types, and treatment regimen.

**Supplemental Table 4. Association between *SLC31A1* rs2233914 (G/A) and response**

| Genotype <sup>a</sup> | Response (CR+PR/SD+PD) | <i>P</i> value <sup>b</sup> | OR(95%CI) <sup>c</sup>  | <i>P</i> value <sup>c</sup> |
|-----------------------|------------------------|-----------------------------|-------------------------|-----------------------------|
| G/G                   | 95/352                 | 0.052                       | 1.00 (ref)              |                             |
| G/A                   | 66/341                 |                             | 0.73 (0.51–1.05)        | 0.089                       |
| A/A                   | 16/105                 |                             | <b>0.51 (0.28–0.92)</b> | <b>0.026</b>                |
| G/A+A/A vs G/G        | 82/446                 | 0.021                       | <b>0.67 (0.48–0.95)</b> | <b>0.024</b>                |

<sup>a</sup> *SLC31A1* rs2233914 (G/A) for the study subjects had been genotyped in our previous report (Ref 9).

<sup>b</sup> *P* values of Pearson  $\chi^2$  tests.

<sup>c</sup> Odds ratios (OR) and their 95% confidence intervals (CIs) and *P* values were calculated with unconditional logistic regression analysis, with adjustment of gender, age, smoking status, ECOG performance status, TNM status, histological types, and treatment regimen.

**Supplemental Table 5. The ORR related to the joint effects of *SLC31A1* rs2233914 (G/A) and *ABCG2* rs2231142 (A/C) polymorphisms**

|                          | <i>SLC31A1</i> (rs2233914) <sup>a</sup> |                        |                             |                           |                        |                             |
|--------------------------|-----------------------------------------|------------------------|-----------------------------|---------------------------|------------------------|-----------------------------|
|                          | G/G                                     |                        |                             | A/G+A/A                   |                        |                             |
|                          | Response<br>(CR+PR/SD+PD)               | OR(95%CI) <sup>b</sup> | <i>P</i> value <sup>a</sup> | Response<br>(CR+PR/SD+PD) | OR(95%CI) <sup>b</sup> | <i>P</i> value <sup>b</sup> |
| <i>ABCG2</i> (rs2231142) |                                         |                        |                             |                           |                        |                             |
| A/A                      | 12/31                                   | 1.00 (ref)             |                             | 17/36                     | 1.34 (0.52–3.43)       | 0.547                       |
| C/C+A/C                  | 83/321                                  | 0.74 (0.35–1.57)       | 0.429                       | 65/410                    | 0.44 (0.20–0.95)       | <b>0.036</b>                |

<sup>a</sup> *SLC31A1* rs2233914 (G/A) for the study subjects had been genotyped in our previous report (Ref 9).

<sup>a</sup> Odds ratios (OR) and their 95% confidence intervals (CIs) and *P* values were calculated with unconditional logistic regression analysis, with adjustment of gender, age, smoking status, ECOG performance status, TNM status, histological types, and treatment regimen.



**Supplemental Table 6. Association between *ABCG2* SNPs and survival**

| SNP            | Genotype       | Overall survival |                      |                   |                          |                       | Progression-free survival |                      |                   |                          |                       |
|----------------|----------------|------------------|----------------------|-------------------|--------------------------|-----------------------|---------------------------|----------------------|-------------------|--------------------------|-----------------------|
|                |                | n/N <sup>a</sup> | MST (m) <sup>b</sup> | Log-rank <i>P</i> | HR (95% CI) <sup>c</sup> | <i>P</i> <sup>c</sup> | n/N <sup>d</sup>          | MST (m) <sup>b</sup> | Log-rank <i>P</i> | HR (95% CI) <sup>c</sup> | <i>P</i> <sup>c</sup> |
| <b>Panel A</b> |                |                  |                      |                   |                          |                       |                           |                      |                   |                          |                       |
| rs2231164      | A/A            | 47/65            | 22.4                 | <b>0.025</b>      | 1.00 (ref)               | 0.123                 | 30/47                     | 9.1                  | 0.951             | 1.00 (ref)               | 0.614                 |
|                | A/G            | 79/104           | 19.3                 |                   | 1.36 (0.92–2.00)         |                       | 47/77                     | 9.8                  |                   | 0.88 (0.52–1.47)         |                       |
|                | G/G            | 47/59            | 15.8                 |                   | <b>1.86 (1.18–2.94)</b>  |                       | 22/41                     | 10.8                 |                   | 0.86 (0.53–2.15)         |                       |
| rs4148157      | G/G            | 84/118           | 21.8                 | <b>0.018</b>      | 1.00 (ref)               | 0.093                 | 51/81                     | 9.1                  | 0.991             | 1.00 (ref)               | 0.705                 |
|                | G/A            | 72/90            | 15.6                 |                   | 1.35 (0.95–1.92)         |                       | 38/67                     | 9.8                  |                   | 0.92 (0.59–1.43)         |                       |
|                | A/A            | 17/0             | 15.1                 |                   | 1.67 (0.95–2.93)         |                       | 10/17                     | 7.1                  |                   | 1.08 (0.52–2.25)         |                       |
|                | G/A+A/A vs G/G | 89/110           | 15.4                 | <b>0.006</b>      | <b>1.40 (1.01–1.96)</b>  | <b>0.045</b>          | 48/84                     | 9.8                  | 0.962             | 0.95 (0.62–1.44)         | 0.793                 |
| rs12505410     | A/A            | 92/114           | 18.7                 | 0.083             | 1.00 (ref)               | 0.079                 | 45/88                     | 10.2                 | 0.137             | 1.00 (ref)               | 0.138                 |
|                | A/C            | 60/85            | 21.4                 |                   | 0.73 (0.51–1.04)         |                       | 42/57                     | 6.9                  |                   | 1.43 (0.89–2.28)         |                       |
|                | C/C            | 21/29            | 21.5                 |                   | 0.82 (0.49–1.36)         |                       | 12/20                     | 12.0                 |                   | 1.08 (0.55–2.13)         |                       |
| rs2231146      | A/A            | 112/142          | 19.3                 | 0.130             | 1.00 (ref)               | 0.202                 | 54/103                    | 10.2                 | 0.153             | 1.00 (ref)               | 0.644                 |
|                | A/G            | 49/68            | 21.0                 |                   | 0.81 (0.57–1.16)         |                       | 38/52                     | 7.1                  |                   | 1.34 (0.85–2.13)         |                       |
|                | G/G            | 12/18            | 21.7                 |                   | 0.67 (0.36–1.25)         |                       | 7/10                      | 10.1                 |                   | 1.22 (0.52–2.89)         |                       |
| rs1871744      | A/A            | 95/121           | 19.3                 | 0.159             | 1.00 (ref)               | 0.153                 | 46/91                     | 10.2                 | <b>0.025</b>      | 1.00 (ref)               | 0.070                 |
|                | A/G            | 61/80            | 20.9                 |                   | 0.82 (0.58–1.16)         |                       | 43/57                     | 6.9                  |                   | 1.54 (0.97–2.44)         |                       |
|                | G/G            | 17/27            | 21.7                 |                   | 0.68 (0.40–1.16)         |                       | 10/17                     | 11.1                 |                   | 0.88 (0.42–1.82)         |                       |
| rs11931123     | A/A            | 148/195          | 20.7                 | 0.577             | 1.00 (ref)               | 0.806                 | 85/143                    | 9.8                  | 0.778             | 1.00 (ref)               | 0.677                 |
|                | A/C            | 24/30            | 19.9                 |                   | 0.94 (0.60–1.49)         |                       | 12/19                     | 6.6                  |                   | 1.15 (0.59–2.25)         |                       |
|                | C/C            | 0/2              | NA                   |                   | NA                       |                       | 1/2                       | 9.3                  |                   | 0.46 (0.06–3.57)         |                       |
| rs2231142      | C/C            | 76/106           | 21.7                 | <b>0.025</b>      | 1.00 (ref)               |                       | 47/74                     | 9.1                  | 0.791             | 1.00 (ref)               |                       |

|                |                |         |      |              |                         |              |         |      |       |                  |       |
|----------------|----------------|---------|------|--------------|-------------------------|--------------|---------|------|-------|------------------|-------|
|                | C/A            | 73/95   | 15.4 |              | <b>1.49 (1.05–2.10)</b> | <b>0024</b>  | 38/70   | 10.2 |       | 0.92 (0.58–1.43) | 0.699 |
|                | A/A            | 24/27   | 21.2 |              | 1.46 (0.88–2.42)        | 0.142        | 14/21   | 7.1  |       | 1.28 (0.67–2.43) | 0.453 |
|                | C/A+A/A vs C/C | 97/122  | 16.6 | <b>0.007</b> | <b>1.48 (1.07–2.06)</b> | <b>0.019</b> | 52/91   | 9.8  | 0.885 | 0.99 (0.66–1.50) | 0.965 |
| rs2231138      | A/A            | 150/194 | 19.8 | 0.158        | 1.00 (ref)              |              | 84/139  | 9.3  | 0.413 | 1.00 (ref)       |       |
|                | A/G            | 23/33   | 23.0 |              | 0.80 (0.5–1.27)         | 0.334        | 15/26   | 12.0 |       | 0.71 (0.39–1.27) | 0.245 |
|                | G/G            | 0/1     | NA   |              | NA                      | NA           | 0/0     | NA   |       | NA               | NA    |
| rs17731538     | G/G            | 157/208 | 20.4 | 0.643        | 1.00 (ref)              |              | 92/153  | 9.5  | 0.549 | 1.00 (ref)       |       |
|                | G/A            | 16/19   | 19.9 |              | 1.07 (0.61–1.85)        | 0.923        | 7/11    | 9.3  |       | 1.05 (0.43–2.55) | 0.916 |
|                | A/A            | 0/1     | NA   |              | NA                      | NA           | 0/1     |      |       | NA               | NA    |
| rs2231137      | G/G            | 61/75   | 19.9 | 0.110        | 1.00 (ref)              |              | 31/61   | 10.8 | 0.322 | 1.00 (ref)       |       |
|                | G/A            | 58/80   | 21.4 |              | 0.98 (0.66–1.45)        | 0.913        | 38/59   | 7.5  |       | 1.02 (0.59–1.78) | 0.942 |
|                | A/A            | 13/21   | 23.0 |              | 0.68 (0.35–1.32)        | 0.252        | 7/14    | 13.1 |       | 0.63 (0.26–1.53) | 0.305 |
| rs2725252      | C/C            | 59/78   | 21.5 | 0.715        | 1.00 (ref)              |              | 38/57   | 7.7  | 0.666 | 1.00 (ref)       |       |
|                | C/A            | 86/116  | 19.3 |              | 1.12 (0.79–1.60)        | 0.535        | 49/86   | 10.2 |       | 1.08 (0.68–1.72) | 0.748 |
|                | A/A            | 28/34   | 20.9 |              | 1.04 (0.65–1.69)        | 0.863        | 12/22   | 9.3  |       | 0.87 (0.42–1.81) | 0.715 |
| rs3109823      | A/A            | 119/149 | 19.6 | 0.179        | 1.00 (ref)              |              | 58/107  | 10.2 | 0.316 | 1.00 (ref)       |       |
|                | A/G            | 45/65   | 21.4 |              | 0.83 (0.57–1.21)        | 0.332        | 36/51   | 7.2  |       | 1.25 (0.80–1.96) | 0.320 |
|                | G/G            | 9/14    | 21.7 |              | 0.73 (0.36–1.47)        | 0.375        | 5/7     | 7.7  |       | 1.06 (0.41–2.76) | 0.905 |
| rs6857600      | G/G            | 138/176 | 19.6 | 0.095        | 1.00 (ref)              |              | 75/126  | 9.5  | 0.826 | 1.00 (ref)       |       |
|                | G/A            | 35/50   | 23.0 |              | 0.69 (0.46–1.02)        | 0.063        | 23/37   | 9.1  |       | 0.93 (0.57–1.52) | 0.771 |
|                | A/A            | 0/2     | NA   |              | NA                      | NA           | 1/2     | 9.3  |       | 0.43 (0.06–3.37) | 0.423 |
| <b>Panel B</b> |                |         |      |              |                         |              |         |      |       |                  |       |
| rs2231164      | A/A            | 152/205 | 19.1 | 0.383        | 1.00 (ref)              |              | 126/200 | 7.7  | 0.660 | 1.00 (ref)       |       |
|                | A/G            | 276/379 | 18.8 |              | 1.01 (0.83–1.24)        | 0.915        | 237/371 | 8.8  |       | 0.98 (0.79–1.22) | 0.883 |
|                | G/G            | 127/160 | 18.2 |              | 1.15 (0.91–1.47)        | 0.242        | 96/160  | 10.2 |       | 0.86 (0.66–1.13) | 0.286 |

|            |                |         |      |              |                         |              |         |      |       |                  |       |
|------------|----------------|---------|------|--------------|-------------------------|--------------|---------|------|-------|------------------|-------|
| rs4148157  | G/G            | 287/402 | 19.0 | 0.120        | 1.00 (ref)              |              | 238/392 | 9.1  | 0.634 | 1.00 (ref)       |       |
|            | G/A            | 236/300 | 18.9 |              | <b>1.20 (1.00–1.43)</b> | <b>0.047</b> | 196/297 | 8.2  |       | 1.09 (0.90–1.32) | 0.380 |
|            | A/A            | 32/42   | 20.2 |              | 1.14 (0.78–1.66)        | 0.507        | 25/42   | 9.1  |       | 1.01 (0.65–1.56) | 0.968 |
|            | G/A+A/A vs G/G | 268/342 | 18.9 | <b>0.040</b> | <b>1.19 (1.01–1.41)</b> | <b>0.048</b> | 221/339 | 8.8  | 0.373 | 1.08 (0.90–1.30) | 0.415 |
| rs12505410 | A/A            | 245/327 | 17.0 | 0.350        | 1.00 (ref)              |              | 210/323 | 8.0  | 0.581 | 1.00 (ref)       |       |
|            | A/C            | 241/327 | 19.7 |              | 0.85 (0.71–1.03)        | 0.093        | 195/320 | 10.1 |       | 0.86 (0.70–1.05) | 0.143 |
|            | C/C            | 69/90   | 22.2 |              | 0.78 (0.59–1.03)        | 0.075        | 54/88   | 8.0  |       | 0.75 (0.55–1.03) | 0.074 |
| rs2231146  | A/A            | 320/436 | 17.9 | 0.725        | 1.00 (ref)              |              | 273/431 | 9.1  | 0.942 | 1.00 (ref)       |       |
|            | A/G            | 198/258 | 19.7 |              | 0.97 (0.80–1.16)        | 0.718        | 153/251 | 9.1  |       | 0.94 (0.77–1.16) | 0.569 |
|            | G/G            | 37/50   | 22.2 |              | 0.87 (0.62–1.24)        | 0.446        | 33/49   | 7.7  |       | 0.89 (0.61–1.29) | 0.533 |
| rs1871744  | A/A            | 257/359 | 18.3 | 0.750        | 1.00 (ref)              |              | 228/355 | 9.1  | 0.884 | 1.00 (ref)       |       |
|            | A/G            | 235/299 | 19.1 |              | 1.06 (0.89–1.27)        | 0.520        | 178/291 | 9.1  |       | 0.96 (0.78–1.17) | 0.656 |
|            | G/G            | 63/86   | 22.2 |              | 0.99 (0.75–1.33)        | 0.969        | 53/85   | 8.0  |       | 0.86 (0.63–1.17) | 0.338 |
| rs11931123 | A/A            | 441/599 | 19.1 | 0.063        | 1.00 (ref)              |              | 369/588 | 9.0  | 0.466 | 1.00 (ref)       |       |
|            | A/C            | 96/117  | 17.8 |              | <b>1.39 (1.10–1.74)</b> | <b>0.005</b> | 68/116  | 9.2  |       | 0.93 (0.71–1.21) | 0.568 |
|            | C/C            | 5/8     | 15.9 |              | 0.86 (0.35–2.11)        | 0.734        | 6/8     | 5.3  |       | 1.39 (0.61–3.19) | 0.435 |
| rs2231142  | C/C            | 248/327 | 19.0 | 0.326        | 1.00 (ref)              |              | 206/338 | 8.8  | 0.807 | 1.00 (ref)       |       |
|            | C/A            | 248/329 | 18.9 |              | 1.06 (0.88–1.27)        | 0.541        | 208/322 | 9.2  |       | 1.07 (0.88–1.30) | 0.496 |
|            | A/A            | 60/76   | 16.5 |              | 1.21 (0.90–1.63)        | 0.207        | 45/71   | 8.2  |       | 1.06 (0.76–1.49) | 0.735 |
|            | C/A+A/A vs C/C | 308/405 | 18.9 | 0.336        | 1.08 (0.91–1.29)        | 0.363        | 253/393 | 9.1  | 0.515 | 1.07 (0.89–1.29) | 0.488 |
| rs2231138  | A/A            | 453/601 | 18.6 | 0.412        | 1.00 (ref)              |              | 371/590 | 8.8  | 0.925 | 1.00 (ref)       |       |
|            | A/G            | 99/137  | 19.3 |              | 0.85 (0.68–1.07)        | 0.163        | 85/135  | 9.3  |       | 1.01 (0.79–1.29) | 0.934 |
|            | G/G            | 3/6     | 43.8 |              | 0.55 (0.18–1.75)        | 0.314        | 3/6     | 7.1  |       | 0.80 (0.25–2.51) | 0.698 |
| rs17731538 | G/G            | 491/661 | 19.0 | 0.513        | 1.00 (ref)              |              | 413/649 | 9.0  | 0.468 | 1.00 (ref)       |       |
|            | G/A            | 62/80   | 17.8 |              | 1.20 (0.91–1.57)        | 0.201        | 44/79   | 9.6  |       | 0.91 (0.66–1.26) | 0.580 |

|            |                |         |      |                          |                         |              |         |      |       |                  |       |
|------------|----------------|---------|------|--------------------------|-------------------------|--------------|---------|------|-------|------------------|-------|
|            | A/A            | 2/3     | 24.3 |                          | 1.90 (0.46–7.86)        | 0.374        | 2/3     | 13.7 |       | 1.13 (0.27–4.64) | 0.868 |
| rs2231137  | G/G            | 140/185 | 17.9 | 0.858                    | 1.00 (ref)              |              | 122/184 | 7.4  | 0.917 | 1.00 (ref)       |       |
|            | G/A            | 199/269 | 19.1 |                          | 0.95 (0.76–1.19)        | 0.641        | 171/267 | 8.8  |       | 0.97 (0.77–1.24) | 0.822 |
|            | A/A            | 57/72   | 20.4 |                          | 0.88 (0.64–1.21)        | 0.439        | 45/71   | 8.0  |       | 0.84 (0.59–1.19) | 0.329 |
| rs2725252  | C/C            | 234/304 | 19.1 | 0.831                    | 1.00 (ref)              |              | 191/298 | 9.0  | 0.668 | 1.00 (ref)       |       |
|            | C/A            | 248/335 | 18.7 |                          | 1.01 (0.84–1.22)        | 0.885        | 210/331 | 8.8  |       | 1.03 (0.84–1.27) | 0.750 |
|            | A/A            | 73/105  | 19.1 |                          | 0.99 (0.75–1.29)        | 0.925        | 58/102  | 9.7  |       | 0.93 (0.69–1.25) | 0.639 |
| rs3109823  | A/A            | 329/448 | 19.1 | 0.937                    | 1.00 (ref)              |              | 275/442 | 9.0  | 0.752 | 1.00 (ref)       |       |
|            | A/G            | 195/257 | 18.8 |                          | 1.02 (0.85–1.22)        | 0.829        | 159/251 | 9.2  |       | 1.04 (0.85–1.28) | 0.677 |
|            | G/G            | 31/39   | 18.8 |                          | 1.01 (0.68–1.49)        | 0.974        | 25/38   | 7.4  |       | 0.82 (0.53–1.26) | 0.361 |
| rs6857600  | G/G            | 426/566 | 18.9 | 0.909                    | 1.00 (ref)              |              | 348/554 | 9.1  | 0.600 | 1.00 (ref)       |       |
|            | G/A            | 116/158 | 19.3 |                          | 0.97 (0.78–1.19)        | 0.739        | 101/157 | 8.0  |       | 1.01 (0.81–1.27) | 0.929 |
|            | A/A            | 13/20   | 17.8 |                          | 0.87 (0.50–1.53)        | 0.631        | 10/20   | 11.9 |       | 0.75 (0.40–1.43) | 0.382 |
| <b>All</b> |                |         |      |                          |                         |              |         |      |       |                  |       |
| rs2231164  | A/A            | 199/270 | 20.7 | <b>0.039</b>             | 1.00 (ref)              |              | 156/247 | 7.7  | 0.636 | 1.00 (ref)       |       |
|            | A/G            | 355/483 | 19.0 |                          | 1.08 (0.91–1.29)        | 0.377        | 284/448 | 9.2  |       | 0.99 (0.82–1.21) | 0.954 |
|            | G/G            | 174/219 | 18.0 |                          | <b>1.26 (1.02–1.55)</b> | <b>0.031</b> | 118/201 | 10.2 |       | 0.88 (0.69–1.12) | 0.282 |
| rs4148157  | G/G            | 371/520 | 20.4 | <b>0.008<sup>e</sup></b> | 1.00 (ref)              |              | 289/473 | 9.1  | 0.672 | 1.00 (ref)       |       |
|            | G/A            | 308/390 | 17.9 |                          | <b>1.21 (1.04–1.42)</b> | <b>0.014</b> | 234/364 | 9.1  |       | 1.09 (0.92–1.30) | 0.336 |
|            | A/A            | 49/62   | 17.0 |                          | 1.25 (0.92–1.70)        | 0.163        | 35/59   | 9.1  |       | 1.03 (0.71–1.49) | 0.883 |
|            | G/A+A/A vs G/G | 357/452 | 17.9 | <b>0.002</b>             | <b>1.22 (1.05–1.42)</b> | <b>0.010</b> | 269/423 | 9.1  | 0.400 | 1.08 (0.91–1.28) | 0.362 |
| rs12505410 | A/A            | 337/441 | 17.1 | 0.064                    | 1.00 (ref)              |              | 255/411 | 9.1  | 0.794 | 1.00 (ref)       |       |
|            | A/C            | 301/412 | 20.7 |                          | <b>0.84 (0.72–0.99)</b> | <b>0.039</b> | 237/377 | 9.3  |       | 0.96 (0.80–1.15) | 0.638 |
|            | C/C            | 90/119  | 21.6 |                          | <b>0.77 (0.61–0.96)</b> | <b>0.034</b> | 66/108  | 9.1  |       | 0.84 (0.63–1.11) | 0.209 |
| rs2231146  | A/A            | 432/578 | 18.2 | 0.218                    | 1.00 (ref)              |              | 327/534 | 9.2  | 0.707 | 1.00 (ref)       |       |

|            |                |         |      |              |                         |              |         |      |       |                  |       |
|------------|----------------|---------|------|--------------|-------------------------|--------------|---------|------|-------|------------------|-------|
|            | A/G            | 247/326 | 20.7 |              | 0.94 (0.80–1.11)        | 0.456        | 191/303 | 8.8  |       | 1.02 (0.85–1.23) | 0.833 |
|            | G/G            | 49/68   | 21.8 |              | 0.79 (0.58–1.06)        | 0.118        | 40/59   | 7.7  |       | 0.98 (0.70–1.37) | 0.882 |
| rs1871744  | A/A            | 352/480 | 18.9 | 0.532        | 1.00 (ref)              |              | 274/446 | 9.2  | 0.593 | 1.00 (ref)       |       |
|            | A/G            | 296/379 | 19.7 |              | 1.02 (0.87–1.19)        | 0.848        | 221/348 | 8.3  |       | 1.04 (0.87–1.25) | 0.651 |
|            | G/G            | 80/113  | 21.7 |              | 0.89 (0.70–1.15)        | 0.379        | 63/102  | 9.4  |       | 0.91 (0.69–1.21) | 0.525 |
| rs11931123 | A/A            | 589/794 | 19.5 | 0.120        | 1.00 (ref)              |              | 454/731 | 9.1  | 0.694 | 1.00 (ref)       |       |
|            | A/C            | 120/147 | 17.9 |              | <b>1.28 (1.05–1.57)</b> | <b>0.016</b> | 80/135  | 9.1  |       | 0.96 (0.75–1.23) | 0.746 |
|            | C/C            | 5/10    | 24.3 |              | 0.79 (0.32–1.92)        | 0.598        | 7/10    | 9.3  |       | 1.09 (0.51–2.33) | 0.828 |
| rs2231142  | C/C            | 327/452 | 20.4 | <b>0.043</b> | 1.00 (ref)              |              | 253/412 | 9.1  | 0.745 | 1.00 (ref)       |       |
|            | C/A            | 321/422 | 17.9 |              | 1.14 (0.97–1.33)        | 0.110        | 246/392 | 9.5  |       | 1.06 (0.89–1.26) | 0.539 |
|            | A/A            | 80/98   | 19.6 |              | 1.27 (0.99–1.64)        | 0.064        | 59/92   | 7.2  |       | 1.11 (0.83–1.49) | 0.487 |
|            | C/A+A/A vs C/C | 401/520 | 18.0 | <b>0.028</b> | 1.16 (1.00–1.35)        | 0.051        | 305/484 | 9.2  | 0.488 | 1.07 (0.90–1.26) | 0.454 |
| rs2231138  | A/A            | 603/795 | 19.0 | 0.111        | 1.00 (ref)              |              | 455/729 | 9.1  | 0.822 | 1.00 (ref)       |       |
|            | A/G            | 122/170 | 20.4 |              | 0.83 (0.68–1.01)        | 0.067        | 100/161 | 9.3  |       | 0.96 (0.77–1.19) | 0.685 |
|            | G/G            | 3/7     | 44.2 |              | 0.44 (0.14–1.37)        | 0.157        | 3/6     | 7.1  |       | 0.76 (0.24–2.39) | 0.639 |
| rs17731538 | G/G            | 648/869 | 19.3 | 0.606        | 1.00 (ref)              |              | 505/802 | 9.1  | 0.487 | 1.00 (ref)       |       |
|            | G/A            | 78/99   | 17.9 |              | 1.20 (0.94–1.53)        | 0.136        | 51/90   | 9.3  |       | 0.94 (0.70–1.26) | 0.664 |
|            | A/A            | 2/4     | 24.3 |              | 1.23 (0.30–5.00)        | 0.778        | 2/4     | 13.7 |       | 0.59 (0.15–2.43) | 0.467 |
| rs2231137  | G/G            | 201/260 | 18.3 | 0.307        | 1.00 (ref)              |              | 153/245 | 7.8  | 0.693 | 1.00 (ref)       |       |
|            | G/A            | 257/349 | 19.7 |              | 0.94 (0.78–1.13)        | 0.504        | 209/326 | 8.7  |       | 1.01 (0.82–1.26) | 0.896 |
|            | A/A            | 70/93   | 21.7 |              | 0.81 (0.61–1.07)        | 0.137        | 52/85   | 9.4  |       | 0.83 (0.60–1.14) | 0.254 |
| rs2725252  | C/C            | 293/382 | 20.2 | 0.964        | 1.00 (ref)              |              | 229/355 | 8.7  | 0.471 | 1.00 (ref)       |       |
|            | C/A            | 334/451 | 18.9 |              | 1.03 (0.88–1.21)        | 0.709        | 259/417 | 9.2  |       | 1.03 (0.86–1.24) | 0.725 |
|            | A/A            | 101/139 | 19.8 |              | 1.01 (0.80–1.27)        | 0.940        | 70/124  | 9.7  |       | 0.88 (0.67–1.16) | 0.357 |
| rs3109823  | A/A            | 448/597 | 19.3 | 0.682        | 1.00 (ref)              |              | 333/549 | 9.1  | 0.437 | 1.00 (ref)       |       |

|           |     |         |      |       |                  |       |         |      |       |                  |       |
|-----------|-----|---------|------|-------|------------------|-------|---------|------|-------|------------------|-------|
|           | A/G | 240/322 | 19.3 |       | 0.99 (0.85–1.17) | 0.945 | 195/302 | 9.2  |       | 1.10 (0.92–1.32) | 0.319 |
|           | G/G | 40/53   | 19.0 |       | 0.88 (0.63–1.23) | 0.449 | 30/45   | 7.4  |       | 0.88 (0.60–1.30) | 0.525 |
| rs6857600 | G/G | 564/742 | 19.1 | 0.340 | 1.00 (ref)       |       | 423/680 | 9.1  | 0.522 | 1.00 (ref)       |       |
|           | G/A | 151/208 | 19.8 |       | 0.89 (0.74–1.06) | 0.197 | 124/194 | 8.0  |       | 1.00 (0.82–1.23) | 0.969 |
|           | A/A | 13/22   | 17.8 |       | 0.85 (0.49–1.47) | 0.551 | 11/22   | 11.9 |       | 0.72 (0.39–1.32) | 0.285 |

<sup>a</sup> Numbers indicate the death event for NSCLC patients during the following-up time among all individuals in the same genotype group.

<sup>b</sup> MST: median survival time.

<sup>c</sup> Hazard ratios (HR) and their 95% confidence intervals (CIs) and *P* values were calculated with by multivariate Cox proportional hazards regression with adjustment for covariates.

<sup>d</sup> Numbers indicate patients who suffered of disease progression (including death) during the following-up time among all individuals in the same genotype group.

<sup>e</sup> Statistical significance remained after Bonferroni multiple tests.

**Supplemental Table 7. Stratification analysis of association between *ABCG2* polymorphisms and overall survival**

| SNP<br>(Wild/Variant,<br>W/V) | Stratification subgroup |              | Overall survival |         |       |                      |      |                                          |                                   |                         |                       |
|-------------------------------|-------------------------|--------------|------------------|---------|-------|----------------------|------|------------------------------------------|-----------------------------------|-------------------------|-----------------------|
|                               |                         |              | n/N <sup>a</sup> |         |       | MST (m) <sup>b</sup> |      |                                          | Log-rank<br><i>P</i> <sup>c</sup> | HR (95%CI) <sup>d</sup> | <i>P</i> <sup>d</sup> |
|                               |                         |              | WW               | WV      | VV    | WW                   | WV   | VV                                       |                                   |                         |                       |
| rs4148157<br>(G/A)            | Gender                  | Male         | 266/364          | 226/278 | 36/47 | 19.4                 | 17.4 | 16.5                                     | 0.133                             | 1.19 (1.00–1.42)        | 0.057                 |
|                               |                         | Female       | 105/156          | 82/112  | 13/15 | 25.2                 | 20.3 | 8.4                                      | <b>0.012</b> <sup>e</sup>         | <b>1.37 (1.01–1.84)</b> | <b>0.041</b>          |
|                               | Age                     | ≤58          | 189/283          | 153/199 | 17/23 | 22.5                 | 19.6 | 21.4                                     | <b>0.017</b> <sup>e</sup>         | <b>1.26 (1.01–1.56)</b> | <b>0.037</b>          |
|                               |                         | >58          | 182/237          | 155/191 | 32/39 | 18.7                 | 15.7 | 16.5                                     | 0.465                             | 1.15 (0.93–1.42)        | 0.200                 |
|                               | Smoking status          | Smoker       | 222/302          | 182/222 | 29/39 | 19.5                 | 16.5 | 21.5                                     | 0.077                             | <b>1.23 (1.01–1.49)</b> | <b>0.038</b>          |
|                               |                         | Nonsmoker    | 148/217          | 124/166 | 19/22 | 22.7                 | 20.0 | 17.0                                     | <b>0.021</b>                      | 1.18 (0.93–1.51)        | 0.178                 |
|                               | ECOG PS                 | 0-1          | 328/468          | 285/356 | 43/55 | 21.0                 | 17.7 | 16.5                                     | <b>0.002</b> <sup>e</sup>         | <b>1.26 (1.08–1.48)</b> | <b>0.004</b>          |
|                               |                         | 2            | 35/43            | 21/31   | 5/6   | 12.4                 | 19.1 | 11.8                                     | 0.608                             | 0.60 (0.33–1.10)        | 0.101                 |
|                               | TNM stage               | IIIA         | 29/41            | 22/30   | 5/5   | 28.8                 | 19.3 | 23.6                                     | 0.546                             | 1.85 (0.98–3.51)        | 0.060                 |
|                               |                         | IIIB         | 107/146          | 87/108  | 21/29 | 21.6                 | 16.0 | 15.3                                     | <b>0.004</b> <sup>e</sup>         | <b>1.50 (1.14–1.99)</b> | <b>0.004</b>          |
|                               |                         | IV           | 234/332          | 196/248 | 23/28 | 18.9                 | 19.0 | 21.9                                     | 0.388                             | 1.11 (0.91–1.34)        | 0.303                 |
|                               | Histologic type         | AC           | 236/333          | 186/240 | 32/39 | 21.9                 | 18.2 | 14.4                                     | <b>0.006</b> <sup>e</sup>         | <b>1.30 (1.08–1.57)</b> | <b>0.006</b>          |
|                               |                         | SCC          | 82/116           | 70/85   | 9/12  | 15.7                 | 17.0 | 20.2                                     | 0.992                             | 0.93 (0.66–1.30)        | 0.654                 |
|                               | Therapy regimens        | Pt-navelbine | 116/162          | 95/122  | 18/22 | 21.9                 | 18.4 | 21.9                                     | 0.521                             | 1.07 (0.82–1.40)        | 0.617                 |
| Pt-gemcitabine                |                         | 89/130       | 76/96            | 9/10    | 22.5  | 17.6                 | 6.0  | <b>3.20×10<sup>-5</sup></b> <sup>e</sup> | <b>1.58 (1.15–2.18)</b>           | <b>0.005</b>            |                       |
| Pt-paclitaxe                  |                         | 115/155      | 97/122           | 16/23   | 18.3  | 17.7                 | 21.5 | 0.279                                    | 0.99 (0.75–1.30)                  | 0.928                   |                       |
| Pt-docetaxel                  |                         | 37/51        | 24/29            | 3/3     | 17.7  | 22.0                 | 16.4 | 0.537                                    | 1.01 (0.61–1.70)                  | 0.958                   |                       |
| rs2231142<br>(C/A)            | Gender                  | Male         | 236/322          | 235/296 | 57/71 | 19.5                 | 17.2 | 20.2                                     | 0.270                             | 1.15 (0.96–1.37)        | 0.128                 |
|                               |                         | Female       | 91/130           | 86/126  | 23/27 | 24.9                 | 22.8 | 17.0                                     | <b>0.017</b> <sup>e</sup>         | 1.28 (0.95–1.72)        | 0.104                 |
|                               | Age                     | ≤58          | 169/244          | 159/220 | 31/41 | 22.5                 | 19.1 | 21.9                                     | 0.137                             | 1.13 (0.92–1.40)        | 0.253                 |
|                               |                         | >58          | 158/208          | 162/202 | 49/57 | 18.2                 | 17.0 | 16.4                                     | 0.391                             | 1.17 (0.95–1.45)        | 0.145                 |
|                               | Smoking status          | Smoker       | 197/266          | 189/238 | 47/59 | 19.5                 | 17.0 | 21.5                                     | 0.245                             | 1.19 (0.97–1.45)        | 0.092                 |
|                               |                         | Nonsmoker    | 129/185          | 130/182 | 32/38 | 22.5                 | 20.2 | 19.6                                     | 0.065                             | 1.13 (0.88–1.43)        | 0.336                 |
|                               | ECOG PS                 | 0-1          | 289/407          | 294/384 | 73/88 | 21.0                 | 17.9 | 17.0                                     | <b>0.014</b> <sup>e</sup>         | <b>1.19 (1.02–1.40)</b> | <b>0.027</b>          |
|                               |                         | 2            | 31/37            | 24/35   | 6/8   | 12.4                 | 19.1 | 21.4                                     | 0.674                             | 0.63 (0.32–1.22)        | 0.168                 |

|                  |                |         |         |       |      |      |      |                                         |                         |              |
|------------------|----------------|---------|---------|-------|------|------|------|-----------------------------------------|-------------------------|--------------|
| TNM stage        | IIIA           | 23/34   | 24/33   | 9/9   | 28.8 | 18.9 | 25.5 | 0.588                                   | 1.80 (0.93–3.48)        | 0.081        |
|                  | IIIB           | 98/131  | 89/114  | 28/38 | 20.9 | 17.0 | 15.3 | <b>0.017<sup>e</sup></b>                | <b>1.46 (1.10–1.94)</b> | <b>0.009</b> |
|                  | IV             | 205/286 | 205/271 | 43/51 | 19.3 | 18.0 | 21.7 | 0.522                                   | 1.06 (0.87–1.28)        | 0.574        |
| Histologic type  | AC             | 204/283 | 203/272 | 47/57 | 22.3 | 18.2 | 16.4 | <b>0.032</b>                            | <b>1.24 (1.03–1.50)</b> | <b>0.025</b> |
|                  | SCC            | 77/107  | 64/82   | 20/24 | 14.6 | 17.0 | 23.6 | 0.992                                   | 0.89 (0.63–1.25)        | 0.488        |
| Therapy regimens | Pt-navelbine   | 98/141  | 104/132 | 27/33 | 22.2 | 17.1 | 23.5 | 0.780                                   | 1.12 (0.85–1.47)        | 0.415        |
|                  | Pt-gemcitabine | 79/115  | 80/105  | 15/16 | 22.5 | 19.3 | 8.4  | <b>4.85×10<sup>-4</sup><sup>e</sup></b> | <b>1.46 (1.06–2.02)</b> | <b>0.020</b> |
|                  | Pt-paclitaxe   | 106/135 | 94/128  | 28/37 | 18.3 | 17.7 | 21.3 | 0.875                                   | 0.88 (0.67–1.15)        | 0.339        |
|                  | Pt-docetaxel   | 31/43   | 28/35   | 5/5   | 20.4 | 17.4 | 17.0 | 0.628                                   | 1.25 (0.75–2.10)        | 0.401        |

<sup>a</sup> Numbers indicate the death event for NSCLC patients during the following-up time among all individuals in the same genotype group.

<sup>b</sup> MST: median survival time.

<sup>c</sup> Log-rank tests for association between survival and overall genotypes.

<sup>d</sup> Hazard ratios (HR) and their 95% confidence intervals (CIs) and *P* values were calculated with by multivariate Cox proportional hazards regression with adjustment for covariates. Dominant models were used to estimate the HRs for the two SNPs.

<sup>e</sup> Statistical significance remained after Bonferroni multiple tests.



**Supplemental Table 8. Joint association of *SLC31A1* rs10759637 (A/C) and *ABCG2* rs2231142 (C/A) with overall survival**

| Stratification subgroup |      | Genotype ( <i>SLC31A1</i> — <i>ABCG2</i> ) <sup>a</sup> | n/N <sup>b</sup> | MST (m) <sup>c</sup> | Log-rank <i>P</i>                       | HR (95% CI) <sup>d</sup>            | <i>P</i> value <sup>d</sup> |
|-------------------------|------|---------------------------------------------------------|------------------|----------------------|-----------------------------------------|-------------------------------------|-----------------------------|
| All                     |      | [A/A+C/C] — [C/C]                                       | 168/237          | 20.2                 | <b>5.20×10<sup>-5</sup><sup>f</sup></b> | 1.00 (ref)                          |                             |
|                         |      | [A/C] — [C/C]                                           | 159/215          | 20.7                 |                                         | 1.01 (0.81–1.27)                    | 0.917                       |
|                         |      | [A/A+C/C] — [C/A+A/A]                                   | 204/285          | 19.9                 |                                         | 0.98 (0.79–1.20)                    | 0.818                       |
|                         |      | [A/C] — [C/A+A/A]                                       | 197/235          | 15.7                 |                                         | <b>1.47 (1.19–1.81)<sup>e</sup></b> | <b>3.84×10<sup>-4</sup></b> |
| Gender                  | Male | [A/A+C/C] — [C/C]                                       | 129/174          | 19.5                 | <b>0.001<sup>f</sup></b>                | 1.00 (ref)                          |                             |
|                         |      | [A/C] — [C/C]                                           | 107/148          | 19.8                 |                                         | 0.97 (0.75–1.27)                    | 0.839                       |
|                         |      | [A/A+C/C] — [C/A+A/A]                                   | 152/206          | 19.5                 |                                         | 0.95 (0.74–1.21)                    | 0.655                       |
|                         |      | [A/C] — [C/A+A/A]                                       | 140/161          | 14.9                 |                                         | <b>1.46 (1.14–1.87)</b>             | <b>0.003</b>                |
|                         |      | [A/A+C/C] — [C/C]                                       | 39/63            | 26.2                 | <b>0.049</b>                            | 1.00 (ref)                          |                             |
|                         |      | [A/C] — [C/C]                                           | 52/67            | 23.3                 |                                         | 1.12 (0.72–1.74)                    | 0.616                       |
|                         |      | [A/A+C/C] — [C/A+A/A]                                   | 52/79            | 24.4                 |                                         | 1.17 (0.76–1.81)                    | 0.482                       |
|                         |      | [A/C] — [C/A+A/A]                                       | 57/74            | 18.9                 |                                         | <b>1.57 (1.02–2.42)</b>             | <b>0.039</b>                |
| Age                     | ≤58  | [A/A+C/C] — [C/C]                                       | 90/129           | 22.3                 | 0.063                                   | 1.00 (ref)                          |                             |
|                         |      | [A/C] — [C/C]                                           | 79/115           | 23.3                 |                                         | 0.91 (0.66–1.24)                    | 0.532                       |
|                         |      | [A/A+C/C] — [C/A+A/A]                                   | 107/156          | 21.2                 |                                         | 0.93 (0.70–1.24)                    | 0.626                       |
|                         |      | [A/C] — [C/A+A/A]                                       | 83/105           | 17.9                 |                                         | 1.35 (0.99–1.84)                    | 0.057                       |
|                         |      | [A/A+C/C] — [C/C]                                       | 78/108           | 18.8                 | <b>0.003<sup>f</sup></b>                | 1.00 (ref)                          |                             |
|                         |      | [A/C] — [C/C]                                           | 80/100           | 16.4                 |                                         | 1.08 (0.78–1.50)                    | 0.632                       |
|                         |      | [A/A+C/C] — [C/A+A/A]                                   | 97/129           | 19.3                 |                                         | 0.97 (0.71–1.32)                    | 0.837                       |
|                         |      | [A/C] — [C/A+A/A]                                       | 114/130          | 14.7                 |                                         | <b>1.56 (1.16–2.11)</b>             | <b>0.003</b>                |
| ECOG PS                 | 0-1  | [A/A+C/C] — [C/C]                                       | 153/218          | 20.4                 | <b>1.50×10<sup>-5</sup><sup>f</sup></b> | 1.00 (ref)                          |                             |
|                         |      | [A/C] — [C/C]                                           | 136/189          | 21.9                 |                                         | 1.00 (0.79–1.27)                    | 0.991                       |
|                         |      | [A/A+C/C] — [C/A+A/A]                                   | 187/258          | 20.2                 |                                         | 0.99 (0.80–1.23)                    | 0.945                       |
|                         |      | [A/C] — [C/A+A/A]                                       | 180/214          | 15.3                 |                                         | <b>1.50 (1.20–1.87)</b>             | <b>3.02×10<sup>-4</sup></b> |
|                         |      | [A/A+C/C] — [C/C]                                       | 11/14            | 17.8                 | 0.776                                   | 1.00 (ref)                          |                             |

|                       |                       |                       |                  |                  |                          |                         |                          |
|-----------------------|-----------------------|-----------------------|------------------|------------------|--------------------------|-------------------------|--------------------------|
|                       |                       | [A/C] — [C/C]         | 20/23            | 10.8             |                          | 0.87 (0.34–2.18)        | 0.763                    |
|                       |                       | [A/A+C/C] — [C/A+A/A] | 16/26            | 19.1             |                          | 0.48 (0.19–1.26)        | 0.137                    |
|                       |                       | [A/C] — [C/A+A/A]     | 14/17            | 19.4             |                          | 0.76 (0.28–2.06)        | 0.586                    |
| Smoking status        | Nonsmoker             | [A/A+C/C] — [C/C]     | 63/97            | 22.3             | 0.090                    | 1.00 (ref)              |                          |
|                       |                       | [A/C] — [C/C]         | 66/88            | 23.8             |                          | 0.99 (0.69–1.41)        | 0.952                    |
|                       |                       | [A/A+C/C] — [C/A+A/A] | 84/120           | 21.2             |                          | 0.97 (0.69–1.37)        | 0.868                    |
|                       | Smoker                | [A/C] — [C/A+A/A]     | 78/100           | 18.9             |                          | 1.32 (0.94–1.86)        | 0.115                    |
|                       |                       | [A/A+C/C] — [C/C]     | 105/140          | 19.8             | <b>0.001<sup>f</sup></b> | 1.00 (ref)              |                          |
|                       |                       | [A/C] — [C/C]         | 92/126           | 18.7             |                          | 1.03 (0.77–1.37)        | 0.854                    |
| [A/A+C/C] — [C/A+A/A] | 119/164               | 19.2                  | 0.99 (0.75–1.30) | 0.914            |                          |                         |                          |
| TNM stage             | IIIA                  | [A/C] — [C/A+A/A]     | 117/133          | 14.3             |                          | <b>1.57 (1.19–2.08)</b> | <b>0.001</b>             |
|                       |                       | [A/A+C/C] — [C/C]     | 11/16            | 31.3             | 0.120                    | 1.00 (ref)              |                          |
|                       |                       | [A/C] — [C/C]         | 12/18            | 15.7             |                          | 2.26 (0.79–6.45)        | 0.127                    |
|                       |                       | [A/A+C/C] — [C/A+A/A] | 16/25            | 27.4             |                          | 2.51 (0.93–6.81)        | 0.070                    |
|                       | IIIB                  | [A/C] — [C/A+A/A]     | 17/17            | 16.5             |                          |                         | <b>3.75 (1.27–11.08)</b> |
|                       |                       | [A/A+C/C] — [C/C]     | 58/78            | 21.0             | <b>0.033</b>             | 1.00 (ref)              |                          |
|                       |                       | [A/C] — [C/C]         | 40/53            | 20.9             |                          | 1.05 (0.69–1.61)        | 0.815                    |
|                       |                       | [A/A+C/C] — [C/A+A/A] | 61/86            | 17.0             |                          | 1.41 (0.97–2.04)        | 0.074                    |
|                       | IV                    | [A/C] — [C/A+A/A]     | 56/66            | 15.3             |                          |                         | <b>1.66 (1.13–2.45)</b>  |
|                       |                       | [A/A+C/C] — [C/C]     | 99/143           | 18.8             | <b>0.007<sup>f</sup></b> | 1.00 (ref)              |                          |
|                       |                       | [A/C] — [C/C]         | 106/143          | 20.0             |                          | 0.92 (0.70–1.22)        | 0.563                    |
|                       |                       | [A/A+C/C] — [C/A+A/A] | 126/172          | 21.3             |                          | 0.82 (0.63–1.08)        | 0.155                    |
| Histological type     | AC                    | [A/C] — [C/A+A/A]     | 122/150          | 16.1             |                          |                         | 1.30 (0.99–1.70)         |
|                       |                       | [A/A+C/C] — [C/C]     | 103/147          | 21.0             | <b>0.005<sup>f</sup></b> | 1.00 (ref)              |                          |
|                       |                       | [A/C] — [C/C]         | 101/136          | 23.6             |                          | 0.91 (0.69–1.21)        | 0.518                    |
|                       | [A/A+C/C] — [C/A+A/A] | 127/176               | 19.6             | 1.04 (0.80–1.35) |                          | 0.794                   |                          |
|                       | SCC                   | [A/C] — [C/A+A/A]     | 123/153          | 16.8             |                          | <b>1.39 (1.06–1.82)</b> | <b>0.016</b>             |
|                       |                       | [A/A+C/C] — [C/C]     | 44/60            | 18.8             | 0.071                    | 1.00 (ref)              |                          |
| [A/C] — [C/C]         |                       | 33/47                 | 13.0             | 1.45 (0.90–2.35) |                          | 0.130                   |                          |
| [A/A+C/C] — [C/A+A/A] | 41/60                 | 22.0                  | 0.81 (0.52–1.28) | 0.375            |                          |                         |                          |

|                  |                |                       |        |      |              |                         |              |
|------------------|----------------|-----------------------|--------|------|--------------|-------------------------|--------------|
| Therapy regimens | Pt-avelbine    | [A/C] — [C/A+A/A]     | 43/46  | 15.2 | 0.111        | 1.38 (0.86–2.20)        | 0.180        |
|                  |                | [A/A+C/C] — [C/C]     | 50/74  | 21.8 |              | 1.00 (ref)              |              |
|                  |                | [A/C] — [C/C]         | 48/67  | 23.6 |              | 1.01 (0.67–1.52)        | 0.969        |
|                  | Pt-gemcitabine | [A/A+C/C] — [C/A+A/A] | 74/100 | 19.9 | <b>0.013</b> | 0.93 (0.64–1.35)        | 0.686        |
|                  |                | [A/C] — [C/A+A/A]     | 57/65  | 16.3 |              | <b>1.50 (1.02–2.21)</b> | <b>0.041</b> |
|                  |                | [A/A+C/C] — [C/C]     | 34/56  | 24.7 |              | 1.00 (ref)              |              |
|                  |                | [A/C] — [C/C]         | 45/59  | 22.5 |              | 1.21 (0.76–1.91)        | 0.428        |
|                  |                | [A/A+C/C] — [C/A+A/A] | 46/63  | 19.1 |              | 1.40 (0.88–2.21)        | 0.154        |
|                  |                | [A/C] — [C/A+A/A]     | 49/58  | 15.7 |              | <b>1.99 (1.24–3.22)</b> | <b>0.005</b> |
|                  | Pt-paclitaxel  | [A/A+C/C] — [C/C]     | 59/71  | 16.0 | <b>0.044</b> | 1.00 (ref)              |              |
|                  |                | [A/C] — [C/C]         | 47/64  | 19.8 |              | 0.80 (0.53–1.18)        | 0.259        |
|                  |                | [A/A+C/C] — [C/A+A/A] | 61/88  | 21.3 |              | <b>0.67 (0.46–0.96)</b> | <b>0.030</b> |
|                  |                | [A/C] — [C/A+A/A]     | 61/77  | 14.2 |              | 0.98 (0.68–1.43)        | 0.929        |
|                  | Pt-docetaxel   | [A/A+C/C] — [C/C]     | 18/25  | 20.9 | 0.466        | 1.00 (ref)              |              |
|                  |                | [A/C] — [C/C]         | 13/18  | 17.7 |              | 1.70 (0.70–4.15)        | 0.241        |
|                  |                | [A/A+C/C] — [C/A+A/A] | 12/18  | 17.0 |              | 1.00 (0.46–2.17)        | 0.996        |
|                  |                | [A/C] — [C/A+A/A]     |        |      |              | <b>2.06 (1.00–4.25)</b> | <b>0.050</b> |

<sup>a</sup> *SLC31A1* rs2233914 (G/A) for the study subjects had been genotyped in our previous report (Ref 9).

<sup>b</sup> Numbers indicate the death event for NSCLC patients during the following-up time among all individuals in the same genotype group.

<sup>c</sup> MST: median survival time.

<sup>d</sup> Hazard ratios (HR) and their 95% confidence intervals (CIs) and *P* values were calculated with by multivariate Cox proportional hazards regression with adjustment for covariates.

<sup>e</sup> Test of interaction for the cohort of all patients with *P* value being 0.007.

<sup>f</sup> Statistical significance remained after Bonferroni multiple tests.

**Supplemental Table 9. Genotypic distribution of *ABCG2* SNPs between NSCLC patients with mild or severe toxicological outcomes**

| Toxicological phenotype and grade (G) |                             | SNP genotype (Wild/Variant, WW–WV–VV) |                 |                  |                 |                 |                  |                 |                 |                  |                 |                 |                 |                 |
|---------------------------------------|-----------------------------|---------------------------------------|-----------------|------------------|-----------------|-----------------|------------------|-----------------|-----------------|------------------|-----------------|-----------------|-----------------|-----------------|
|                                       |                             | rs2231164 (A/G)                       | rs4148157 (G/A) | rs12505410 (A/C) | rs2231146 (A/G) | rs1871744 (A/G) | rs11931123 (A/C) | rs2231142 (C/A) | rs2231138 (A/G) | rs17731538 (G/A) | rs2231137 (G/A) | rs2725252 (C/A) | rs3109823 (A/G) | rs6857600 (G/A) |
| Gastrointestinal toxicity             | G0+G2                       | 246–438–200                           | 470–357–57      | 410–364–110      | 537–286–61      | 443–341–100     | 721–135–10       | 413–383–88      | 721–155–8       | 790–90–4         | 242–316–88      | 343–411–130     | 549–288–47      | 674–190–20      |
|                                       | G3+G4                       | 20–42–18                              | 41–34–5         | 32–39–9          | 41–33–6         | 35–32–13        | 63–13–1          | 34–37–9         | 69–11–0         | 71–8–1           | 18–31–4         | 35–36–9         | 46–30–4         | 61–16–3         |
|                                       | <i>P</i> value <sup>a</sup> | 0.843                                 | 0.934           | 0.418            | 0.235           | 0.339           | 0.948            | 0.760           | 0.444           | 0.716            | 0.295           | 0.577           | 0.669           | 0.685           |
| Hematologic toxicity                  | G0+G2                       | 198–383–156                           | 388–306–43      | 344–310–83       | 442–246–49      | 359–294–84      | 589–121–9        | 339–332–66      | 609–121–7       | 650–82–5         | 192–265–66      | 285–341–111     | 452–247–38      | 553–165–19      |
|                                       | G3+G4                       | 71–102–59                             | 130–85–17       | 98–96–38         | 134–78–20       | 115–87–30       | 199–28–2         | 112–92–28       | 185–46–1        | 215–17–0         | 67–83–28        | 94–109–29       | 145–72–15       | 183–45–4        |
|                                       | <i>P</i> value <sup>a</sup> | 0.101                                 | 0.358           | 0.106            | 0.573           | 0.728           | 0.215            | 0.209           | 0.378           | 0.090            | 0.490           | 0.614           | 0.631           | 0.446           |
| Anemia                                | G0+G2                       | 251–461–203                           | 485–374–56      | 421–380–114      | 543–309–63      | 443–364–108     | 735–149–10       | 427–397–91      | 755–153–7       | 812–99–4         | 243–324–88      | 356–425–134     | 560–305–50      | 690–203–22      |
|                                       | G3+G4                       | 8–12–9                                | 12–13–4         | 12–14–3          | 20–6–3          | 20–6–3          | 29–0–0           | 8–18–3          | 19–10–0         | 29–0–0           | 9–12–3          | 15–14–0         | 21–5–3          | 25–4–0          |
|                                       | <i>P</i> value <sup>a</sup> | 0.488                                 | 0.180           | 0.764            | 0.307           | 0.079           | 0.057            | 0.108           | 0.045           | 0.171            | 0.991           | 0.066           | 0.136           | 0.339           |
| Leukopenia                            | G0+G2                       | 229–421–181                           | 437–341–53      | 383–347–101      | 497–278–56      | 410–324–97      | 627–130–10       | 383–366–82      | 684–138–9       | 737–89–5         | 219–300–79      | 328–382–121     | 512–275–44      | 631–179–21      |
|                                       | G3+G4                       | 44–68–37                              | 85–55–9         | 67–62–20         | 89–48–12        | 74–59–16        | 127–19–1         | 70–64–15        | 120–29–0        | 139–10–0         | 46–51–16        | 56–72–21        | 93–48–8         | 115–31–3        |
|                                       | <i>P</i> value <sup>a</sup> | 0.511                                 | 0.599           | 0.905            | 0.830           | 0.946           | 0.525            | 0.970           | 0.322           | 0.187            | 0.613           | 0.867           | 0.978           | 0.908           |
| Neutropenia                           | G0+G2                       | 225–420–175                           | 431–341–48      | 382–345–93       | 494–271–55      | 402–323–95      | 655–137–9        | 377–369–74      | 677–137–6       | 724–91–5         | 218–292–73      | 315–383–122     | 508–266–46      | 615–185–20      |
|                                       | G3+G4                       | 31–51–33                              | 62–43–10        | 45–48–22         | 63–42–10        | 57–42–16        | 101–11–1         | 56–41–18        | 89–25–1         | 108–7–0          | 31–44–16        | 53–49–13        | 69–40–6         | 91–22–2         |
|                                       | <i>P</i> value <sup>a</sup> | 0.182                                 | 0.411           | 0.045            | 0.486           | 0.712           | 0.131            | 0.036           | 0.400           | 0.203            | 0.405           | 0.251           | 0.878           | 0.614           |
| Thrombocytopenia                      | G0+G2                       | 249–463–204                           | 481–377–58      | 422–384–110      | 546–309–61      | 450–361–105     | 742–143–10       | 420–406–90      | 751–158–7       | 815–96–5         | 241–330–86      | 360–426–133     | 565–302–49      | 694–200–22      |
|                                       | G3+G4                       | 12–12–10                              | 21–11–2         | 14–13–7          | 21–8–5          | 16–11–7         | 27–6–1           | 17–13–4         | 28–6–0          | 31–3–0           | 12–9–5          | 13–18–3         | 21–9–4          | 26–7–1          |
|                                       | <i>P</i> value <sup>a</sup> | 0.217                                 | 0.559           | 0.327            | 0.128           | 0.251           | 0.506            | 0.770           | 1.000           | 0.831            | 0.281           | 0.584           | 0.242           | 1.000           |
| Overall toxicity                      | G0+G2                       | 181–342–144                           | 353–275–39      | 316–275–76       | 410–213–44      | 333–260–74      | 532–110–8        | 311–297–59      | 546–114–7       | 590–73–4         | 176–239–62      | 255–308–104     | 416–217–34      | 499–151–17      |
|                                       | G3+G4                       | 85–132–68                             | 157–108–20      | 119–122–44       | 158–103–24      | 135–111–39      | 241–37–3         | 135–117–33      | 233–51–1        | 260–24–1         | 79–105–31       | 116–134–35      | 172–96–17       | 224–55–6        |
|                                       | <i>P</i> value <sup>a</sup> | 0.374                                 | 0.558           | 0.129            | 0.201           | 0.498           | 0.340            | 0.346           | 0.539           | 0.473            | 0.873           | 0.398           | 0.782           | 0.456           |

<sup>a</sup> *P* values of Pearson  $\chi^2$  tests.

**Supplemental Table 10. Association between *ABCG2* SNPs and toxicity outcomes**

| SNP        | Genotype        | Toxicity    | Toxicity grade (G3+G4/G0+G2) | <i>P</i> value <sup>a</sup> | OR (95% CI) <sup>b</sup> | <i>P</i> value <sup>b</sup> |
|------------|-----------------|-------------|------------------------------|-----------------------------|--------------------------|-----------------------------|
| rs12505410 | A/A             | Neutropenia | 45/382                       | 0.045                       | 1.00 (ref)               |                             |
|            | A/C             |             | 48/345                       |                             | 1.19 (0.76–1.88)         | 0.442                       |
|            | C/C             |             | 22/93                        |                             | <b>2.29 (1.28–4.10)</b>  | <b>0.005</b>                |
|            | C/C vs A/A+A/C  |             | 93/727                       |                             | <b>2.09 (1.23–3.57)</b>  | <b>0.007</b>                |
| rs1871744  | A/A             | Anemia      | 20/443                       | 0.079                       | 1.00 (ref)               |                             |
|            | A/G             |             | 6/364                        |                             | <b>0.37 (0.14–0.95)</b>  | <b>0.039</b>                |
|            | G/G             |             | 3/108                        |                             | 0.57 (0.16–2.03)         | 0.387                       |
|            | A/G+GG vs A/A   |             | 9/472                        |                             | <b>0.42 (0.19–0.95)</b>  | <b>0.038</b>                |
| rs2231142  | C/C             | Neutropenia | 56/377                       | 0.036                       | 1.00 (ref)               |                             |
|            | C/A             |             | 41/369                       |                             | 0.74 (0.48–1.15)         | 0.182                       |
|            | A/A             |             | 18/74                        |                             | 1.51 (0.81–2.83)         | 0.199                       |
|            | A/A vs C/C+A/C  |             | 97/746                       |                             | 1.73 (0.95–3.15)         | 0.073                       |
| rs2231138  | A/A             | Anemia      | 19/755                       | 0.045                       | 1.00 (ref)               |                             |
|            | A/G             |             | 10/153                       |                             | <b>2.57 (1.12–5.89)</b>  | <b>0.026</b>                |
|            | G/G             |             | 0/7                          |                             | NA                       | NA                          |
|            | A/G vs A/A+ G/G |             | 19/762                       |                             | <b>2.60 (1.13–5.94)</b>  | <b>0.024</b>                |

<sup>a</sup> *P* values of Pearson  $\chi^2$  tests for overall distributions for SNPs genotypes between severe and mild toxicological phenotypes.

<sup>b</sup> Odds ratios (OR) and their 95% confidence intervals (CIs) and *P* values were calculated with unconditional logistic regression analysis, with adjustment of gender, age, smoking status, ECOG performance status, TNM status, histological types, and treatment regimen.

**Supplemental Table 11. Association between objective response rate and overall survival**

| Stratification subgroup |                | Overall survival |          |                      |          |                                |                         |                       |
|-------------------------|----------------|------------------|----------|----------------------|----------|--------------------------------|-------------------------|-----------------------|
|                         |                | n/N <sup>a</sup> |          | MST (m) <sup>b</sup> |          | Log-rank <i>P</i> <sup>c</sup> | HR (95%CI) <sup>d</sup> | <i>P</i> <sup>d</sup> |
|                         |                | nonresponse      | response | nonresponse          | response |                                |                         |                       |
| All                     |                | 588/775          | 126/170  | 19.1                 | 20.7     | 0.181                          | <b>0.82 (0.67–1.00)</b> | <b>0.050</b>          |
| Gender                  | Male           | 428/548          | 92/125   | 17.7                 | 21.7     | 0.062                          | <b>0.74 (0.59–0.94)</b> | <b>0.013</b>          |
|                         | Female         | 160/227          | 34/45    | 24.4                 | 20.2     | 0.701                          | 1.20 (0.81–1.77)        | 0.357                 |
| Age                     | ≤58            | 300/411          | 51/79    | 21.2                 | 22.6     | 0.182                          | <b>0.73 (0.53–1.00)</b> | <b>0.049</b>          |
|                         | >58            | 288/364          | 75/91    | 16.8                 | 19.8     | 0.384                          | 0.81 (0.62–1.07)        | 0.133                 |
| Smoking status          | Smoker         | 351/449          | 77/103   | 17.1                 | 21.7     | <b>0.037</b>                   | <b>0.70 (0.54–0.91)</b> | <b>0.007</b>          |
|                         | Nonsmoker      | 236/325          | 49/67    | 21.7                 | 20.2     | 0.666                          | 1.15 (0.83–1.58)        | 0.401                 |
| ECOG PS                 | 0-1            | 528/699          | 117/156  | 19.1                 | 21.3     | 0.280                          | 0.82 (0.67–1.01)        | 0.067                 |
|                         | 2              | 51/65            | 8/13     | 19.1                 | 17.9     | 0.378                          | 0.42 (0.18–1.01)        | 0.053                 |
| TNM stage               | IIIA           | 39/52            | 17/23    | 21.3                 | 25.5     | 0.544                          | 0.74 (0.39–1.40)        | 0.357                 |
|                         | IIIB           | 167/220          | 44/55    | 18.7                 | 20.7     | 0.325                          | <b>0.67 (0.47–0.95)</b> | <b>0.026</b>          |
|                         | IV             | 378/498          | 65/92    | 19.4                 | 20.0     | 0.597                          | 0.89 (0.67–1.16)        | 0.381                 |
| Histologic type         | AC             | 388/517          | 56/76    | 20.4                 | 21.3     | 0.340                          | 0.88 (0.66–1.17)        | 0.386                 |
|                         | SCC            | 117/153          | 43/57    | 13.7                 | 23.0     | <b>0.027</b>                   | <b>0.65 (0.45–0.94)</b> | <b>0.021</b>          |
| Therapy regimens        | Pt-navelbine   | 173/222          | 52/70    | 21.5                 | 19.3     | 0.739                          | 0.85 (0.62–1.18)        | 0.333                 |
|                         | Pt-gemcitabine | 142/192          | 26/37    | 20.2                 | 17.9     | 0.620                          | 0.90 (0.58–1.41)        | 0.652                 |
|                         | Pt-paclitaxe   | 192/253          | 34/45    | 17.7                 | 22.6     | 0.073                          | <b>0.58 (0.39–0.85)</b> | <b>0.005</b>          |
|                         | Pt-docetaxel   | 54/70            | 9/11     | 17.7                 | 23.3     | 0.808                          | 0.80 (0.32–1.98)        | 0.621                 |

<sup>a</sup> Numbers indicate the death event for NSCLC patients during the following-up time among all individuals in the same response or nonresponse group.

<sup>b</sup> MST: median survival time.

<sup>c</sup> Log-rank tests for association between survival and overall response.

<sup>d</sup> Hazard ratios (HR) and their 95% confidence intervals (CIs) and *P* values were calculated with by multivariate Cox proportional hazards regression with adjustment for covariates.

**Supplemental Table 12. Association between objective response rate and progression free survival**

| Stratification subgroup |                | progression free survival |          |                      |          |                                |                         |                       |
|-------------------------|----------------|---------------------------|----------|----------------------|----------|--------------------------------|-------------------------|-----------------------|
|                         |                | n/N <sup>a</sup>          |          | MST (m) <sup>b</sup> |          | Log-rank <i>P</i> <sup>c</sup> | HR (95%CI) <sup>d</sup> | <i>P</i> <sup>d</sup> |
|                         |                | nonresponse               | response | nonresponse          | response |                                |                         |                       |
| All                     |                | 461/715                   | 94/159   | 7.7                  | 12.4     | <b>0.001</b>                   | <b>0.72 (0.58–0.91)</b> | <b>0.005</b>          |
| Gender                  | Male           | 323/500                   | 67/116   | 8.1                  | 12.5     | <b>0.003</b>                   | <b>0.69 (0.52–0.90)</b> | <b>0.007</b>          |
|                         | Female         | 138/215                   | 27/43    | 6.5                  | 11.4     | 0.128                          | 0.90 (0.58–1.39)        | 0.629                 |
| Age                     | ≤58            | 254/382                   | 40/73    | 7.1                  | 12.5     | <b>0.003</b>                   | <b>0.60 (0.42–0.85)</b> | <b>0.004</b>          |
|                         | >58            | 207/333                   | 54/86    | 9.0                  | 11.7     | 0.107                          | 0.81 (0.59–1.10)        | 0.179                 |
| Smoking status          | Smoker         | 269/413                   | 55/95    | 8.2                  | 13.1     | <b>0.003</b>                   | <b>0.65 (0.48–0.88)</b> | <b>0.005</b>          |
|                         | Nonsmoker      | 191/301                   | 39/64    | 7.1                  | 10.5     | 0.115                          | 0.80 (0.56–1.15)        | 0.228                 |
| ECOG PS                 | 0-1            | 409/647                   | 85/146   | 8.0                  | 12.5     | <b>0.004</b>                   | <b>0.75 (0.59–0.96)</b> | <b>0.021</b>          |
|                         | 2              | 44/59                     | 9/13     | 3.7                  | 8.8      | 0.111                          | 0.58 (0.24–1.37)        | 0.211                 |
| TNM stage               | IIIA           | 25/43                     | 13/21    | 9.6                  | 13.1     | 0.652                          | 0.56 (0.26–1.21)        | 0.141                 |
|                         | IIIB           | 125/197                   | 27/50    | 7.3                  | 13.7     | <b>0.015</b>                   | <b>0.56 (0.36–0.86)</b> | <b>0.008</b>          |
|                         | IV             | 308/470                   | 54/88    | 7.5                  | 10.3     | 0.057                          | 0.78 (0.58–1.06)        | 0.108                 |
| Histologic type         | AC             | 316/484                   | 43/73    | 7.8                  | 12.6     | <b>0.020</b>                   | 0.75 (0.54–1.04)        | 0.085                 |
|                         | SCC            | 90/138                    | 27/50    | 7.2                  | 13.6     | <b>0.005</b>                   | <b>0.62 (0.40–0.97)</b> | <b>0.035</b>          |
| Therapy regimens        | Pt-navelbine   | 112/220                   | 36/69    | 13.8                 | 12.5     | 0.313                          | 0.75 (0.51–1.11)        | 0.151                 |
|                         | Pt-gemcitabine | 119/173                   | 24/33    | 9.4                  | 8.8      | 0.917                          | 1.07 (0.68–1.69)        | 0.773                 |
|                         | Pt-paclitaxe   | 166/232                   | 24/40    | 5.7                  | 14.6     | <b>0.004</b>                   | <b>0.49 (0.31–0.78)</b> | <b>0.003</b>          |
|                         | Pt-docetaxel   | 36/53                     | 6/10     | 7.2                  | 10.8     | 0.325                          | 0.63 (0.20–1.99)        | 0.432                 |

<sup>a</sup> Numbers indicate the event for NSCLC patients during the following-up time among all individuals in the same response or nonresponse group.

<sup>b</sup> MST: median survival time.

<sup>c</sup> Log-rank tests for association between PFS and overall response.

<sup>d</sup> Hazard ratios (HR) and their 95% confidence intervals (CIs) and *P* values were calculated with by multivariate Cox proportional hazards regression with adjustment for covariates.

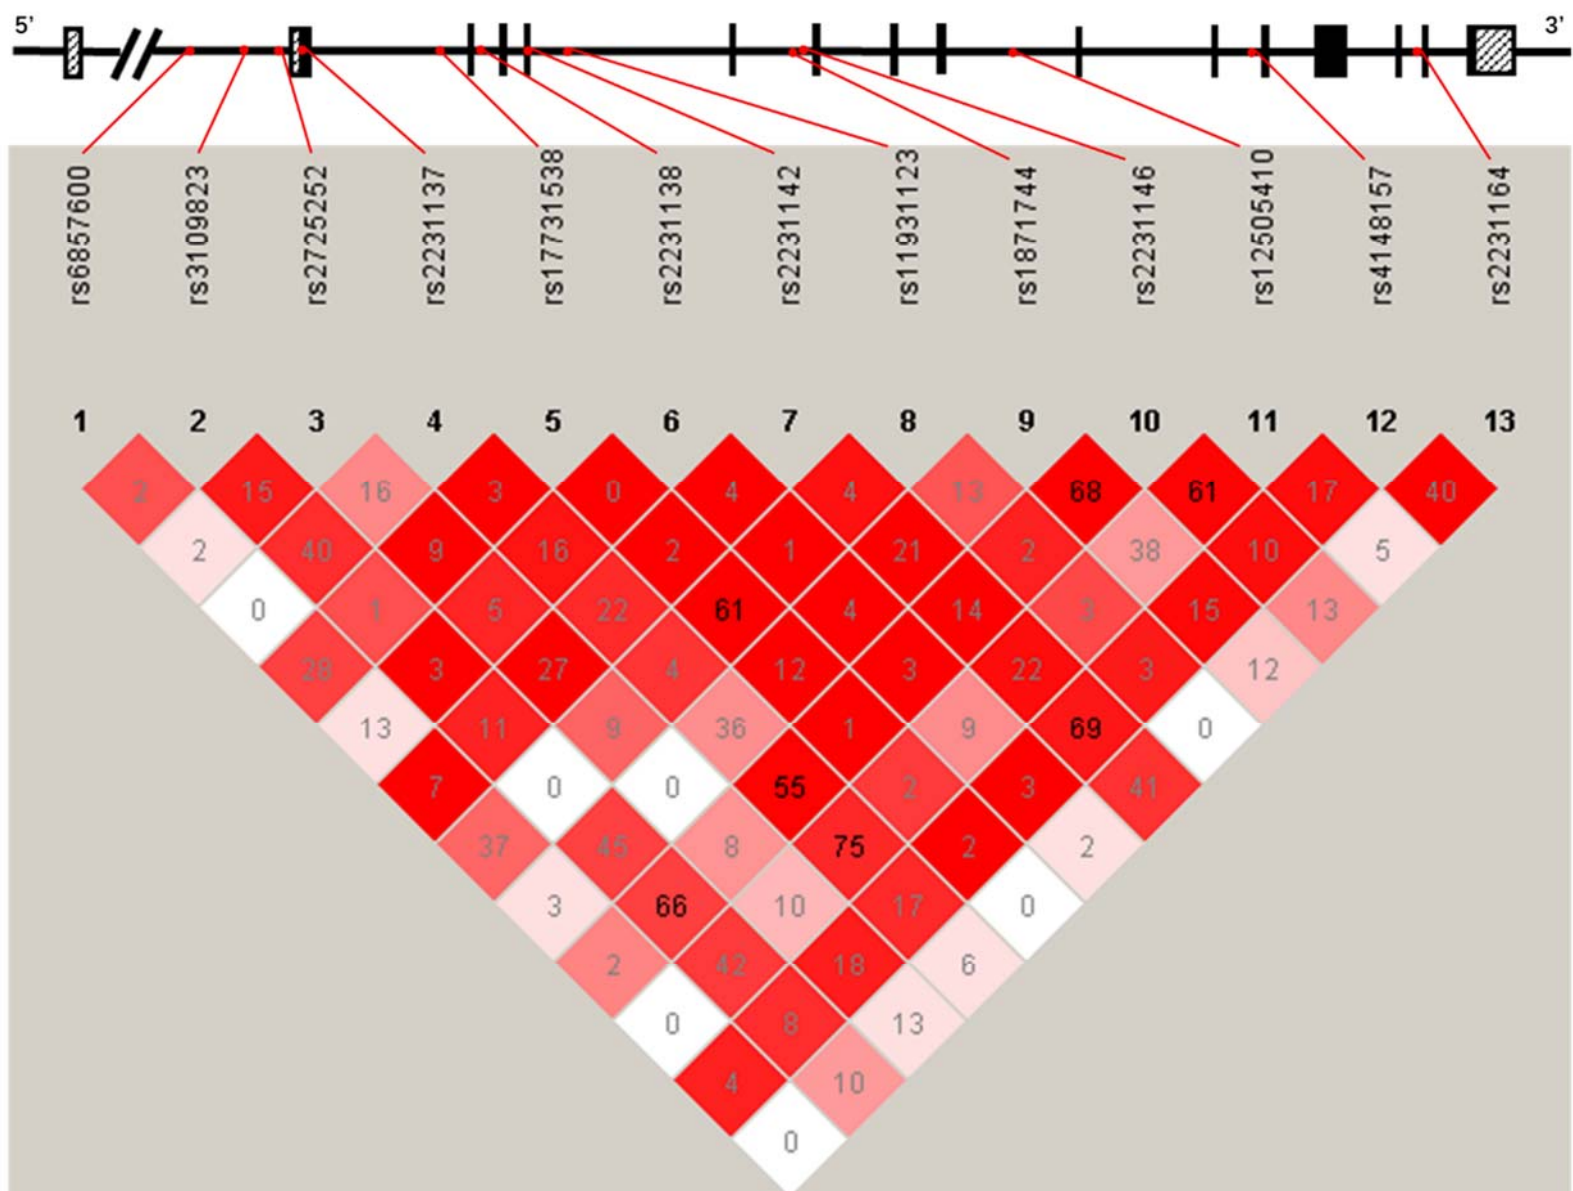

**Supplemental Figure 1 Schematic structure of *ABCG2* gene and linkage disequilibrium of its candidate SNPs in the NSCLC cohort.** The color intensity is proportional to  $D'$  and the percent numbers represent  $r^2$ .



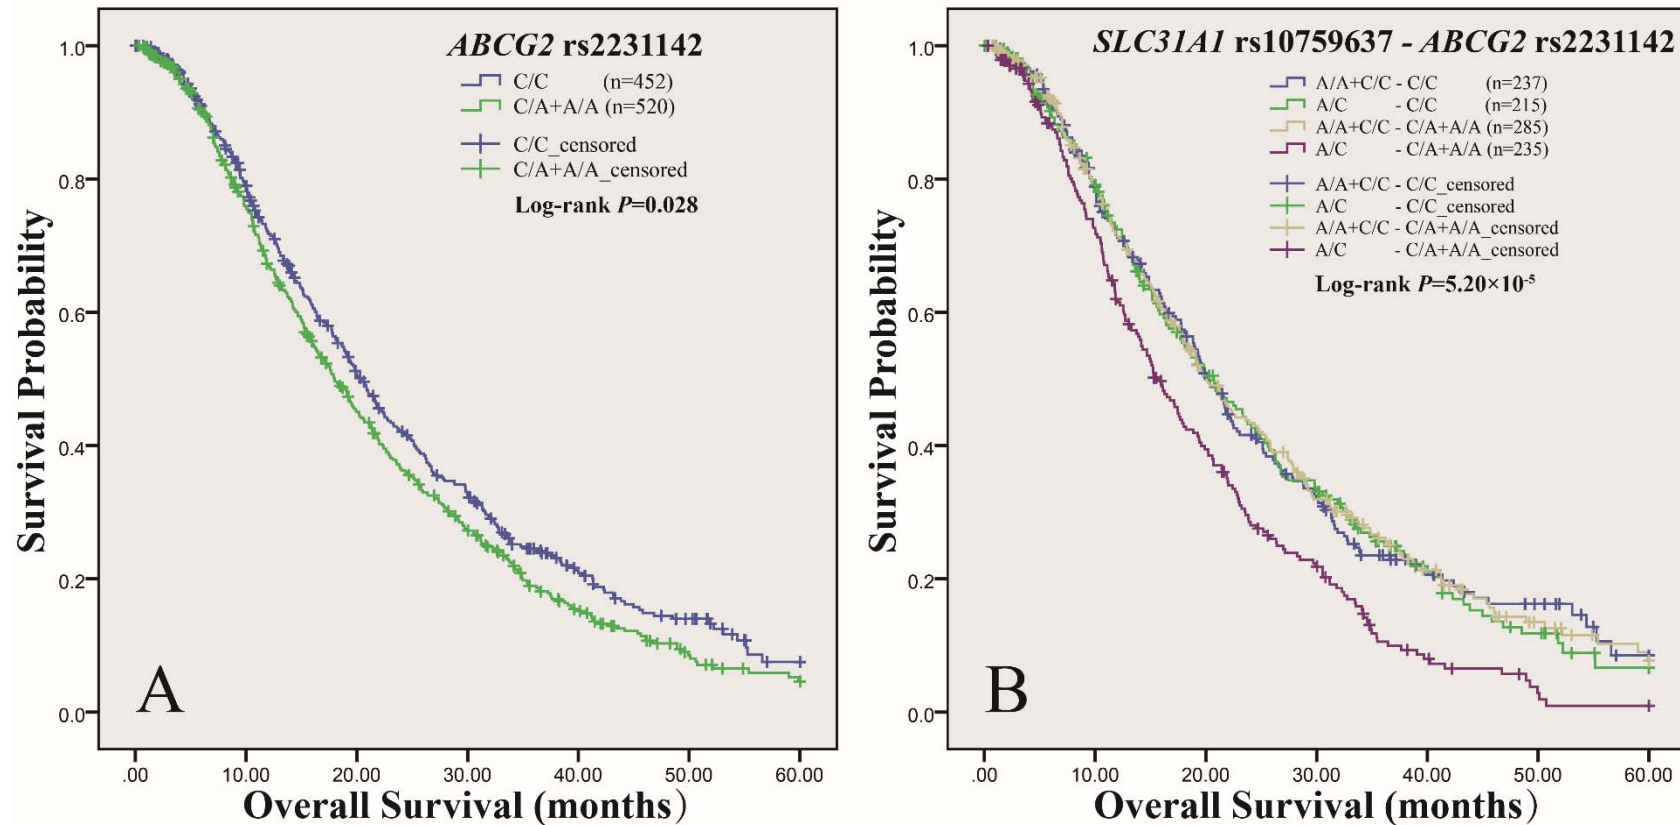

**Supplemental Figure 2 Kaplan-Meier curve of estimated overall survival for the NSCLC cohort according to *ABCG2* rs2231142 and *SLC31A1* rs10759637 polymorphisms.** The curves were plotted with SPSS software according to the genotypes of *ABCG2* rs2231142 (A) and the combined genotypes of *ABCG2* rs2231142 and *SLC31A1* rs10759637 (B). For rs2231142 C/A, the C/A+A/A genotypes group was compared to the wild C/C as reference in dominant model. For rs10759637 A/C, the A/C heterozygote was compared to the A/A+C/C homozygotes group as reference in under-dominant model.
